# Supplementary material
Source: Springer Nature journal article supplement (https://www.springermedizin.de/resource/supplementary/12887_2010_443_MOESM1_ESM.pdf/9475154)
Supplement: MOESM1 [file 9475154]

## **PILOT STUDY**

Selecting disease-specific situations  
(based on professionals, parents and literature)

Filming these situations in 15 families  
(describing parent and child behaviors)

Constructing new domains for parent and child

Scoring 15 families with the OKI-DO observational tool

Preliminary psychometric results

## **LARGE SCALE VALIDATION STUDY**

Filming and scoring diabetes-specific situations  
(that resulted from the pilot study) in 120 families

Evaluating the psychometric performance of the OKI-DO observational tool
